# Supplementary material for: Three-dimensional assemblies of graphene prepared by a novel chemical reduction-induced self-assembly method
Source: Royal Society of Chemistry journal article supplement (doi:10.1039/c2nr32157b), 2012-01-01

**Electronic Supplementary Information for**

**Three-dimensional assemblies of graphene  
prepared by a novel chemical reduction-  
induced self-assembly method**

Lianbin Zhang,<sup>‡a</sup> Guoying Chen,<sup>‡a,b</sup> Mohamed Nejib Hedhili,<sup>c</sup> Hongnan Zhang,<sup>a</sup> and Peng  
Wang<sup>\*a</sup>

\*To whom correspondence should be addressed.

E-mail: [peng.wang@kaust.edu.sa](mailto:peng.wang@kaust.edu.sa)

**Fig. S1** FTIR spectra of GO reduced by OA and NaI for different duration.

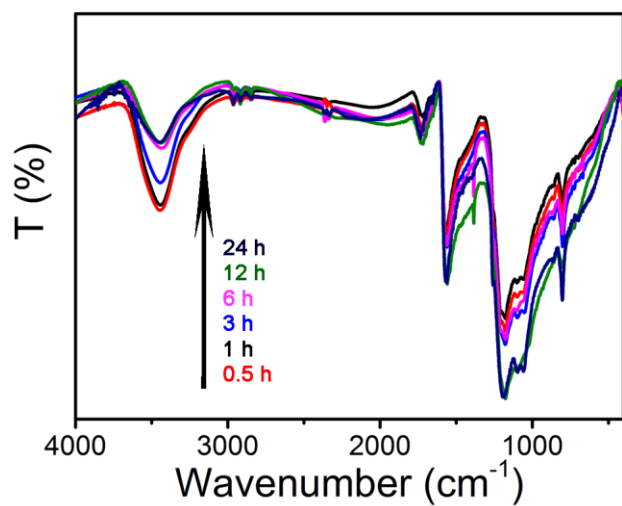

**Fig. S2** Photograph of the products of the GO reacted with either NaI or OA alone. These products are mainly discrete and piece-wise agglomerates without a regular morphology.

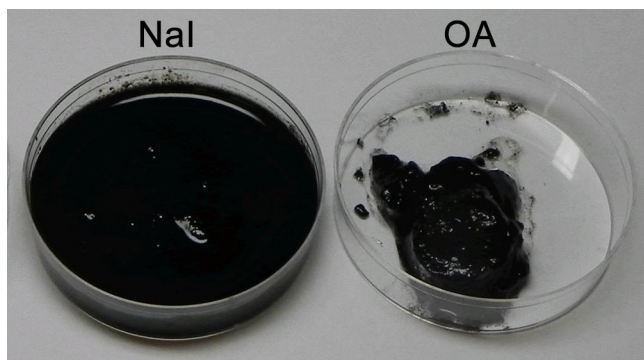

Supplement: c2nr32157b.pdf [file c2nr32157b.pdf]
